# Supplementary material for: High-throughput characterization of genetic effects on DNA–protein binding and gene transcription
Source: PubMed Central journal article supplement (PMC6211638; doi:10.1101/gr.237354.118), 2018-11

A

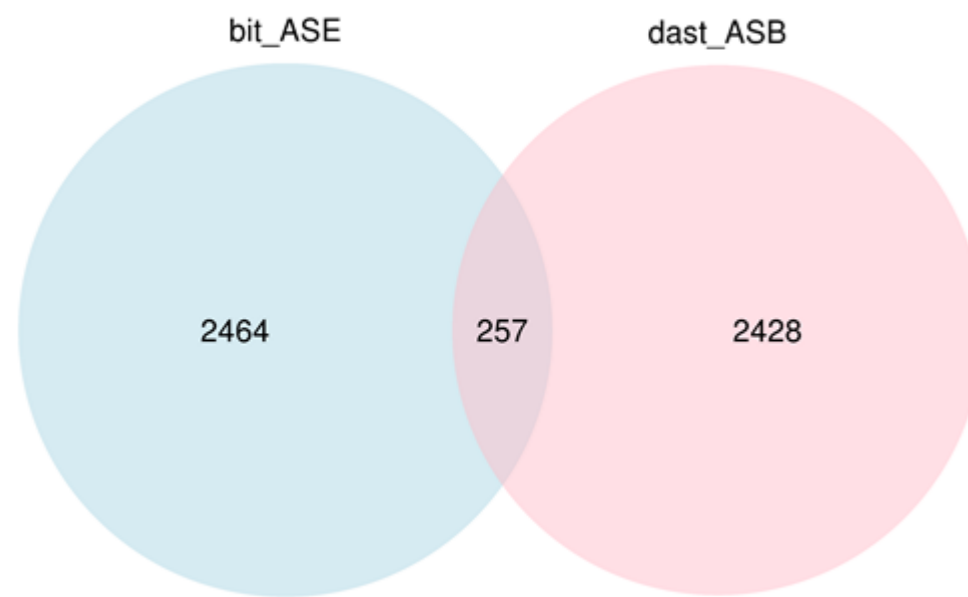

B

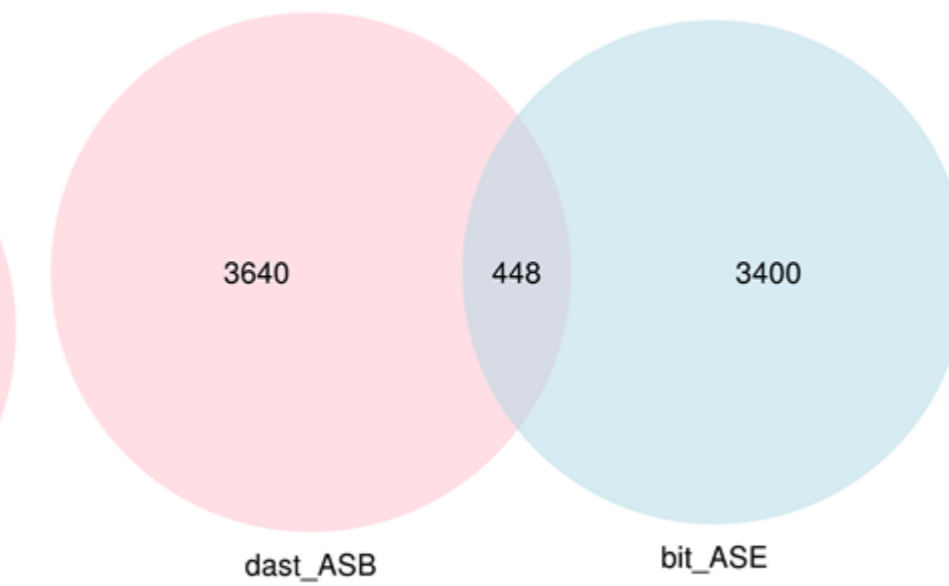

C

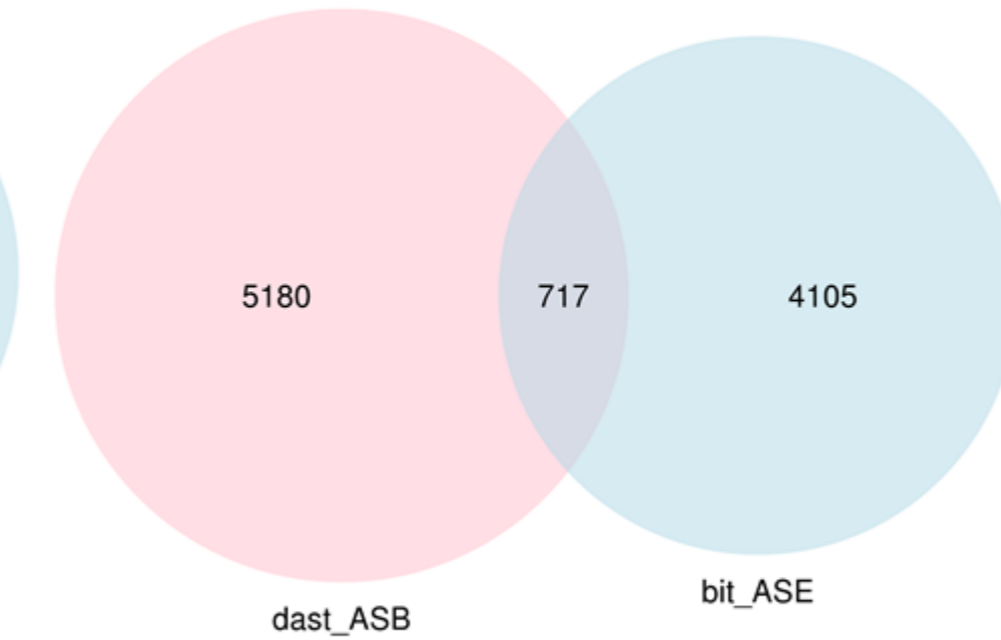

D

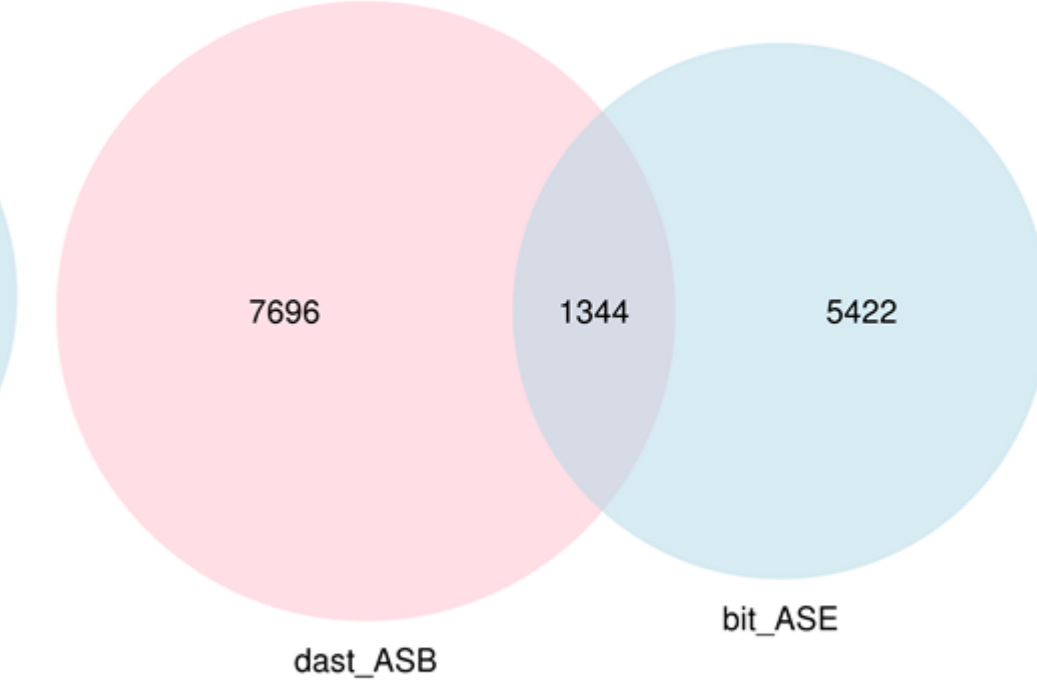

Supplement: supp_gr.237354.118_Supplemental_Fig_S9.pdf [file supp_gr.237354.118_Supplemental_Fig_S9.pdf]
