# Supplementary material for: High-throughput characterization of genetic effects on DNA–protein binding and gene transcription
Source: PubMed Central journal article supplement (PMC6211638; doi:10.1101/gr.237354.118), 2018-11
Supplement: supp_gr.237354.118_Supplemental_Methods_S2.pdf [file supp_gr.237354.118_Supplemental_Methods_S2.pdf]

## BiT-STARR-seq Protocol

Table 1: Primers used in BiT-STARR-seq

| Primer         | Sequence                                                    |
|----------------|-------------------------------------------------------------|
| STARR_F_SH     | CCGAGCCCACGAGACCTAGAGTCGGGGCGGCCG                           |
| STARR_R_SH     | TGACGCTGCCGACGAAATTATTACACGGCGATC                           |
| F_transposase  | TCGTCGGCAGCGTCAGATGTGTATAAGAGACAG                           |
| R_transposase  | GTCTCGTGGGCTCGGAGATGTGTATAAGAGACAG                          |
| F_trans_short  | TCGTCGGCAGCGTCAGAT                                          |
| I2.1           | CAAGCAGAAGACGGCATAACGA                                      |
| Nextera_i7_10N | CAAGCAGAAGACGGCATAACGAGAT <b>RDHBVDHBVD</b> GTCTCGTGGGCTCGG |

## Part 1

PCR to double strand oligo and fill out sequencing primer

1. Resuspend oligos to 10ng/ $\mu$ l WS
2. PCR1 prep samples

| Component                | 20 $\mu$ l Reaction | Final Concentration |
|--------------------------|---------------------|---------------------|
| Nuclease-free water      | 6.4 $\mu$ l         |                     |
| 10 $\mu$ M F_transposase | 1 $\mu$ l           | 0.5 $\mu$ M         |
| 10 $\mu$ M R_transposase | 1 $\mu$ l           | 0.5 $\mu$ M         |
| Template DNA             | 1 $\mu$ l oligo WS  | 10ng                |
| DMSO                     | 0.6 $\mu$ l         | 3%                  |
| 2X Phusion Master Mix    | 10 $\mu$ l          | 1X                  |

Gently mix the reaction. Collect all liquid to the bottom of the tube by a quick spin if necessary. cycling conditions: 98°C for 30s, followed by 4 cycles of 98°C for 10s, 50°C for 30s, 72°C for 60s, followed by 6 cycles of 98°C for 10s, 65°C for 30s, 72°C for 60s, followed by 72°C for 5 min

3. Nucleospin gel and PCR cleanup
  - a. Run 2% gel 100V 50min

## PCR to amplify oligos

### 4. PCR2

| Component                | Volume                              | Final concentration |
|--------------------------|-------------------------------------|---------------------|
| Nuclease-free water      | 6.4 $\mu$ l                         |                     |
| 10 $\mu$ M F_transposase | 1 $\mu$ l                           | 0.5 $\mu$ M         |
| 10 $\mu$ M R_transposase | 1 $\mu$ l                           | 0.5 $\mu$ M         |
| Template DNA             | dilute PCR1 1:5, then use 1 $\mu$ l |                     |
| DMSO                     | 0.6 $\mu$ l                         | 3%                  |
| 2X Phusion Master Mix    | 10 $\mu$ l                          | 1X                  |

Gently mix the reaction. Collect all liquid to the bottom of the tube by a quick spin if necessary. cycling conditions: 98°C for 30s, followed by 15 cycles of 98°C for 10s, 50°C for 30s, 72°C for 60s, followed by 72°C for 5 min

### 5. Nucleospin gel and PCR cleanup

- a. Run 2% gel 100V 50min
- b. Nanodrop

Prepare plasmid for cloning

6. Linearize pGL4.23

| Component                | Volume       | Final Concentration |
|--------------------------|--------------|---------------------|
| 5 $\mu$ M STARR_F_SH     | 1.5 $\mu$ l  | 0.20.3 $\mu$ M      |
| 5 $\mu$ M STARR_F_SH     | 1.5 $\mu$ l  | 0.20.3 $\mu$ M      |
| 1 ng/ $\mu$ l pGL4.23    | 1 $\mu$ l    |                     |
| Nuclease-free water      | 8.5 $\mu$ l  |                     |
| CloneAmp HiFi PCR Premix | 12.5 $\mu$ l | 1X                  |

Gently mix the reaction. Collect all liquid to the bottom of the tube by a quick spin if necessary. cycling conditions: 35 cycles of 98°C for 10s, 60°C for 15s, and 72°C for 5s.

7. Nucleospin gel and PCR cleanup

- a. Run 1% gel 100V 60min

## Cloning

### 8. Clone libraries with putative enhancer sequences into linearized pGL4.23 plasmid

#### a. Set up cloning reactions: (36 rxns per set + pos and neg ctrls)

| Component     | Cloning Rxn   | Negative control | Positive control                  |
|---------------|---------------|------------------|-----------------------------------|
| PCR2 oligos   | 25ng          | NA               | 2 $\mu$ l of 2kb control insert   |
| Linear Vector | 100ng         | 1 $\mu$ l        | 1 $\mu$ l of pUC19 control vector |
| Premix        | 2 $\mu$ l     | 2 $\mu$ l        | 2 $\mu$ l                         |
| Water         | to 10 $\mu$ l | to 10 $\mu$ l    | to 10 $\mu$ l                     |

#### b. Incubate for 15 min at 50°C then place on ice.

#### c. Cleanup using Pureyield Miniprep columns

- i. Add cloning rxns (36) to spin column
- ii. Spin at full speed (20000 rcf) for 15 sec
- iii. Add 400  $\mu$ l wash buffer, and spin at full speed for 15 sec
- iv. Empty column and spin additional 30sec
- v. Add 30  $\mu$ l elution buffer, sit 1 min, spin at full speed 1 min

## Transformation

### 9. Transformation using XL-10 gold competent cells (1x).

- a. Prior to start: Make LB with amp plates
- b. 100  $\mu$ l cells thawed on ice. Add 4  $\mu$ l B-mercap. (in 14ml tube)
- c. Ice 10min, occasional mixing.
- d. Add 2  $\mu$ l cloning rxn
- e. Ice 30min. Take out SOC to thaw.
- f. Heat shock 30sec at 42°C (water bath)
- g. Ice 2min
- h. Add 900  $\mu$ l SOC
- i. Shaker 1 hr (37°C)
- j. Plate 1  $\mu$ l (+99  $\mu$ l SOC)
- k. Incubate overnight, count colonies \*hoping to get 200colonies (or more)
- l. Calculate complexity (example below)

Colonies\*dilution\*plated V

200\*1000  $\mu$ l\*1  $\mu$ l = 200k

105k constructs\*(want to see 5x)\*(2 directions)=1050k

1050000/200000=5.25 transformations \*(2 for safety) = 10.5 transformations

### 10. Repeat transformation doing full replicates.

- a. Combine transformations. Plate 1  $\mu$ l on LB plate + amp, and incubate overnight. Place remainder in LB broth + amp and grow overnight at 37°C in shaker. 200ml per flask (want 4x).
- b. Check that plate has good colony growth. (optional: keep for miniprep and sanger seq confirmation)

### 11. Maxiprep (4x) using Qiagen Endo-free maxiprep kit (no changes made to standard protocol)

- a. Nanodrop. Aliquot.

## Part 2

### 1. Nucleofection LCLs

#### a. Prior to Start:

- i. media bottle in water bath
- ii. Prepare DNA (want  $[3 \mu\text{g}] * \text{number of cuvettes (3 per replicate)}$ ) and aliquot into microcentrifuge tubes (1 per replicate)
- iii. Prepare required amount of solution+supplement (ratio 1:4.5). 82  $\mu\text{l}$  SE solution:18  $\mu\text{l}$  supplement 1 per cuvette

#### b. Count cells

c. Spin down required amount ( $7.5 \times 10^6$  per cuvette) at 90G for 10 min

d. Resuspend cells in solution +supplement (100  $\mu\text{l}$  per cuvette)

e. Add cells to DNA tubes

f. Dispense into cuvette (max volume 110  $\mu\text{l}$ )- make sure they are all the way in the bottom groove and tap lightly on the hood

g. Electroporate with correct program (DS-150 and SE solution)

h. Let sit at room temperature for 10 min

i. Add media to cuvette pipetting into the side of the well gently (450  $\mu\text{l}$ )

j. Incubate at 37°C for 30min

k. Mix cells once gently, then seed into T75 flask (1 per replicate, 27ml total volume)

l. Incubate 24 hrs

#### m. Lysis

i. Pellet by centrifugation (e.g., 400 x g for 8 minutes at 4°C).

ii. Wash the pellets by re-suspending in ice cold phosphate-buffered saline (PBS), 5ml. Pellet cells by centrifugation again. Gently aspirate the supernatant from each tube.

iii. Make LysisBinding Buffer (RT): Add 10  $\mu\text{l}$  b-ME per 1 ml Buffer RLT Plus (want 1.8ml per replicate).

iv. Add the appropriate volume of LysisBinding Buffer (RT) to each replicate.

v. Triturate the solution through a pipette tip to obtain complete lysis. The release of DNA during lysis results in a viscous solution which confirms complete lysis.

vi. Freeze at -80°C to aid in the lysis step (at least 1 day).

## DNA Library Prep

1. Prepare the PCR reaction mix to add the index adaptors to the DNA.

| Component                   | Volume      |
|-----------------------------|-------------|
| Nuclease-free water         | 10 $\mu$ l  |
| N5xx Index Adaptor          | 2.5 $\mu$ l |
| 15 $\mu$ M Nextera.i7.10N   | 2.5 $\mu$ l |
| DNA (Maxiprep plasmid pool) | 50ng        |
| NEB Next 2x Master Mix      | 25 $\mu$ l  |

Gently mix the reaction. Collect all liquid to the bottom of the tube by a quick spin if necessary. cycling conditions: 72°C for 5 min followed by 98°C for 30s, followed by 5 cycles of 98°C for 10s, 63°C for 30s, 72°C for 60s. Hold at 4°C.

Perform side reaction to determine number of cycles to add:

| Component                 | Volume      |
|---------------------------|-------------|
| Nuclease-free water       | 3 $\mu$ l   |
| N5xx Index Adaptor        | 0.5 $\mu$ l |
| 15 $\mu$ M Nextera.i7.10N | 0.5 $\mu$ l |
| 5 cycle-PCR amplified DNA | 5 $\mu$ l   |
| 10X SYBR Green I          | 1 $\mu$ l   |
| NEB Next 2x Master Mix    | 5 $\mu$ l   |

Gently mix the reaction. Collect all liquid to the bottom of the tube by a quick spin if necessary. cycling conditions: 20 cycles of 98°C for 10s, 63°C for 30s, 72°C for 60s. Calculate 25% max threshold and finish PCR cycles.

2. Nucleospin gel and PCR cleanup

a. Run 2% gel 100V 50min

3. QC:

a. Run on bioanalyzer to check peak is correct ( about 350bp)

b. Run Kappa quant qPCR to get library concentration for loading.



## RNA Library Prep

### 1. Total RNA extraction

a. Pipet the lysate (600  $\mu$ l) directly into a QIAshredder spin column placed in a 2 ml collection tube, and centrifuge for 2 min at full speed (17900 rcf).

b. Transfer homogenized lysate to a gDNA Eliminator spin column, and centrifuge 30sec at full speed. Discard column and SAVE flow through.

c. Add 600  $\mu$ l (1 volume) of 70% ethanol to the flow-through, and mix well by pipetting. Do not centrifuge.

d. Transfer up to 700  $\mu$ l of the sample, including any precipitate, to an RNeasy spin column placed in a 2 ml collection tube (supplied). Close the lid, and centrifuge for 15 s full speed. Discard the flow-through.

e. Add 700  $\mu$ l Buffer RW1 to the RNeasy Mini spin column (in a 2 ml collection tube). Close the lid, and centrifuge for 15 s at full speed. Discard the flow-through

f. Add 500  $\mu$ l Buffer RPE to the RNeasy spin column. Close the lid, and centrifuge for 15 s at full speed. Discard the flow-through.

g. Add 500  $\mu$ l Buffer RPE to the RNeasy spin column. Close the lid gently, and centrifuge for 2 min at full speed.

h. Place the RNeasy spin column in a new 2 ml collection tube (supplied). Centrifuge at full speed for 1 min to further dry the membrane.

i. Place the RNeasy spin column in a new 1.5 ml collection tube (supplied). Add 52  $\mu$ l RNase-free water directly to the spin column membrane. Wait 1 min. Close the lid, and centrifuge for 1 min at full speed to elute the RNA.

j. Add 52  $\mu$ l RNase-free water directly to the spin column membrane. Wait 1 min. Close the lid, and centrifuge for 1 min at full speed to elute the RNA.

## 2. Total RNA to mRNA

- a. Resuspend Dynabeads Oligo(dT)25 thoroughly before use.
- b. Transfer 200  $\mu$ l of Dynabeads from the stock tube to each well on an RNase-free 96-well plate and place the plate on the magnet.
- c. After 30 seconds (or when the suspension is clear), remove the supernatant.
- d. Remove the plate from the magnet and wash the beads by re-suspending in 200  $\mu$ l of fresh LysisBinding Buffer.
- e. Adjust the volume of up to 75  $\mu$ g total RNA to 100  $\mu$ l with 10 mM Tris-HCl, pH 7.5 (should already be at 100  $\mu$ l)
- f. Heat to 65°C for 2 minutes to disrupt secondary structures. Place on ice.
- g. Remove the Lysis/Binding Buffer from the prewashed Dynabeads Oligo(dT)25 by placing on the magnet for 30 seconds, or until the suspension is clear and discard the supernatant.
- h. Remove the plate from the magnet and add 100  $\mu$ l total RNA plus 100  $\mu$ l LysisBinding Buffer.
- i. Pipet to resuspend the beads completely in the sample lysate.
- j. Seal the plate and incubate with continuous mixing in the heat block for 5 min, at 25°C and 1000 rpm, to allow the polyA tail of the mRNA to hybridize to the oligo (dT)25 on the beads.
- k. Place the plate on the magnet for 2 minutes and remove the supernatant. If the solution is noticeably viscous, increase the time to approximately 10 minutes.
- l. Set the heat block to 80°C for later step.
- m. Remove the beads from the magnet and wash the beads/ mRNA complex two times
- n. Wash the beads/mRNA complex with 200  $\mu$ l Washing Buffer B at RT, place on magnet 5 minutes. Be sure to RINSE the SIDES OF THE WELLS with Washing Buffer B.
- o. Collect the mRNA elution from the beads by adding 10  $\mu$ l of 10mM Tris-HCl pH 7.5 (Elution Buffer), mixing well, and incubate at 80°C for 2 minutes.
- p. Immediately place the plate on the magnet, about 1 min wait and transfer the supernatant (9  $\mu$ l) containing the mRNA to a new RNase-free plate and place on ice. Note: Take 1  $\mu$ l from each well into a plate for quantification.

## cDNA synthesis

3. cDNA synthesis using Superscript III kit standard protocol.
4. Purify the cDNA using SPRI Beads
  - a. Swirl SPRI beads to resuspend.
  - b. Pool cDNA reactions for the same replicate to get 60ul final volume.
  - c. Add 54  $\mu$ l (0.9X) of resuspended SPRI beads to the pooled cDNA reaction. Mix well on a vortex mixer or by pipetting up and down at least 10 times.
  - d. Cover the plate with an aluminum PCR seal and incubate for 5 minutes at room temperature.
  - e. Place the plate on an appropriate magnetic stand to separate beads from the supernatant. After the solution is clear (about 2 minutes), carefully remove and discard the supernatant. Be careful not to disturb the beads that contain DNA targets.
  - f. Add 200  $\mu$ l of freshly prepared 80% ethanol to each well of the plate while in the magnetic stand. Incubate at room temperature for 30 seconds, and then carefully remove and discard the supernatant.
  - g. Repeat Step 5 once for a total of 2 washing steps.
  - h. Air-dry the beads for 2 minutes, while the plate is on the magnetic stand uncovered.
  - i. Elute the DNA target from the beads into 21  $\mu$ l water. Mix well on a vortex mixer or by pipetting up and down. Cover the plate with an aluminum PCR seal and quickly spin the plate in a microcentrifuge and place it on the magnetic stand until the solution is clear.
  - j. Transfer 20  $\mu$ l of the supernatant to a clean PCR plate.

PCR to target oligo in cDNA and amplify

5. Targeted PCR

| Component                | Volume      |
|--------------------------|-------------|
| 10 $\mu$ M F_trans_short | 1.7 $\mu$ l |
| 10 $\mu$ M I.2.1         | 1.7 $\mu$ l |
| Pure cDNA                | 20 $\mu$ l  |
| DMSO                     | 1.5 $\mu$ l |
| 2X Phusion Master Mix    | 25 $\mu$ l  |

Include DNA positive control (3  $\mu$ l DNA library and 17  $\mu$ l nuclease free water) to use as a marker for size selection on the gel. Gently mix the reaction. Collect all liquid to the bottom of the tube by a quick spin if necessary.

cycling conditions: 98°C for 30s, followed by 15 cycles of 98°C for 10s, 72°C for 15s, followed by 72°C for 5 min

6. Nucleospin gel and PCR cleanup

- a. Run 2% gel 140V 2 hrs

PCR to add multiplexing index and amplify

#### 7. Index PCR

| Component             | Volume      |
|-----------------------|-------------|
| N5xx Index Adaptor    | 1.7 $\mu$ l |
| 15 $\mu$ M I.2.1      | 1.7 $\mu$ l |
| Pure targeted PCR     | 20 $\mu$ l  |
| DMSO                  | 1.5 $\mu$ l |
| 2X Phusion Master Mix | 25 $\mu$ l  |

Gently mix the reaction. Collect all liquid to the bottom of the tube by a quick spin if necessary. cycling conditions: 98°C for 30s, followed by 5 cycles of 98°C for 10s, 72°C for 15s, followed by 72°C for 2 min

Preform side reaction to determine number of cycles to add:

| Component                 | Volume      |
|---------------------------|-------------|
| Nuclease-free water       | 3 $\mu$ l   |
| N5xx Index Adaptor        | 0.5 $\mu$ l |
| 15 $\mu$ M I.2.1          | 0.5 $\mu$ l |
| 5 cycle-PCR amplified DNA | 5 $\mu$ l   |
| 10X SYBR Green I          | 1 $\mu$ l   |
| 2X Phusion Master Mix     | 5 $\mu$ l   |

Gently mix the reaction. Collect all liquid to the bottom of the tube by a quick spin if necessary. cycling conditions: 30 cycles of 98°C for 10s, 72°C for 15s.

Calculate 25% max threshold and finish PCR cycles. X cycles of 98°C for 10s, 72°C for 15s, followed by 72°C for 5 min.

#### 8. Nucleospin gel and PCR cleanup

- a. Run 2% gel 140V 2 hrs

#### 9. QC:

- a. Run on bioanalyzer to check peak is correct (about 350bp)
- b. Run Kappa quant qPCR to get library concentration for loading.
